# Supplementary material
Source: PubMed Central journal article supplement (PMC6012513)
Supplement: jciinsight-3-99672-s086.pdf [file jciinsight-3-99672-s086.pdf]

## Prediction of acute GVHD and relapse by metabolic biomarkers after allogeneic hematopoietic stem cell transplantation

Xiaojin Wu<sup>1,2,3,4,5\*</sup>, Yiyu Xie<sup>1,2,3,4\*</sup>, Chang Wang<sup>5\*</sup>, Yue Han<sup>1,2,3,4\*</sup>, Xiebing Bao<sup>1,2,3,4\*</sup>, Shoubao Ma<sup>1,2,3,4</sup>, Ahmet Yilmaz<sup>6</sup>, Bingyu Yang<sup>1,2,3,4</sup>, Yuhan Ji<sup>1,2,3,4</sup>, Jinge Xu<sup>1,2,3,4</sup>, Hong Liu<sup>1,2,3,4</sup>, Suning Chen<sup>1,2,3,4</sup>, Jianying Zhang<sup>8</sup>, Jianhua Yu<sup>6,7#</sup>, Depei Wu<sup>1,2,3,4#</sup>

1. Jiangsu Institute of Hematology, the First Affiliated Hospital of Soochow University, Suzhou, China;
  2. Institute of Blood and Bone Marrow Transplantation, Suzhou, China;
  3. Collaborative Innovation Center of Hematology, Soochow University, Suzhou, China;
  4. Key Laboratory of Thrombosis and Hemostasis of Ministry of Health, Suzhou, China;
  5. School of Radiation Medicine and Protection, Medical College of Soochow University, Collaborative Innovation Center of Radiological Medicine of Jiangsu Higher Education Institutions, Jiangsu Provincial Key Laboratory of Radiation Medicine and Protection, Suzhou, China;
  6. Comprehensive Cancer Center, The Ohio State University, Columbus, OH, USA;
  7. Division of Hematology, Department of Internal Medicine, The Ohio State University;
  8. Center for Biostatistics, The Ohio State University, Columbus, OH, USA
- \*These authors contributed equally to the work.*

### Supplementary Materials

#### TABLE OF CONTENTS

#### Clinical outcomes

**Figure S1.** Representative total ion chromatograms (TIC) of serum metabolites.

**Figure S2.** Reproducibility of metabolic profiling platform used in this study.

**Table S1.** Comparison of sixteen detectable metabolites between 0-I and II-IV aGVHD groups of patients.

**Table S2.** Effect of potential risk factors, including the SA:PA ratio, on day 7 post-transplantation on aGVHD risk.

**Table S3.** Effect of potential risk factors, including the SA:PA ratio, on day 7 post-transplantation on overall survival.

**Table S4.** Effect of potential risk factors, including the SA:PA ratio, on day 7 post-

transplantation on the risk of relapse after transplantation.

**Table S5.** Association of PA, SA, and SA:PA ratio with the occurrence of CMV or EBV infection or bacterial infection within 30 days post- transplantation.

### **Clinical outcomes**

The median follow-up time for the whole cohort was 42 months (range, 0.2 to 60 months). The median time for neutrophil recovery was 12 days (range, 10 to 37 days), and the median time for platelet recovery was 14 days (range, 8 to 90 days). The cumulative incidence of CMV reactivation was 53.67%. The median time for CMV reactivation was 2.9 months. The cumulative incidence of EBV infection was 17.32%. The median time to EBV reactivation was 8 months. The cumulative incidence of bacterial infection within 30 days post transplantation was 51.35%. Of the 114 patients evaluated for aGVHD, the cumulative incidence of grade II-IV aGVHD at day 100 was 53.63%. The median day for developing aGVHD was day 30. Fifty-one patients passed away and the 5-year probability of overall survival (OS) was 54.74% and disease free survival (DFS) was 51.60% for the whole cohort. In the 114 patients who survived and were in remission beyond 100 days, the cumulative incidence of cGVHD at 5 years was 52.63%. Thirty-two patients had relapsed by the time of the last follow-up. The 5-year cumulative incidence of relapse was 31.18%.

**Figure S1. Representative total ion chromatograms (TIC) of serum metabolites.** Representative GC-MS TIC of serum metabolites 7 days post hematopoietic stem cell transplantation in 0-I (top panel) and II-IV (bottom panel) aGVHD patients

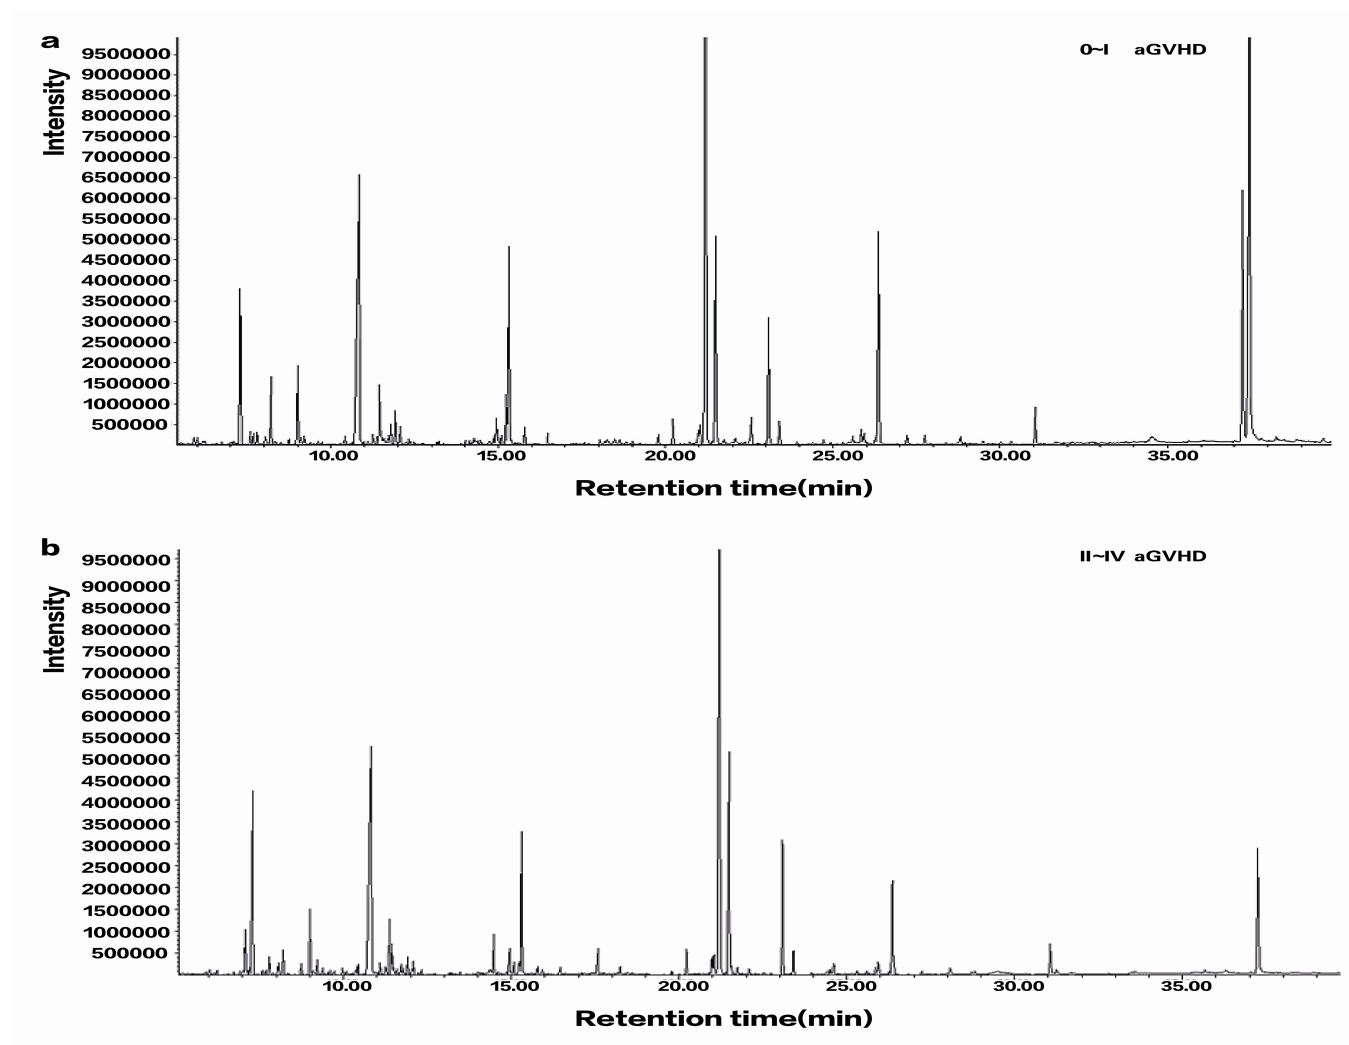

**Figure S2. Reproducibility of metabolic profiling platform used in this study.** Metabolite abundance quantified in serum samples over two QC replicates are shown. The Spearman correlation coefficient between technical replicates varied between 0.91 and 0.97, depending on the pair of replicates used. To obtain reliable data, samples from each group were injected in a random order. Thirteen repeated injections of the same QC samples were inserted into the analytical sequence during the GC-MS analysis to trace the batch-to-batch variability and reliability of the metabolic data.

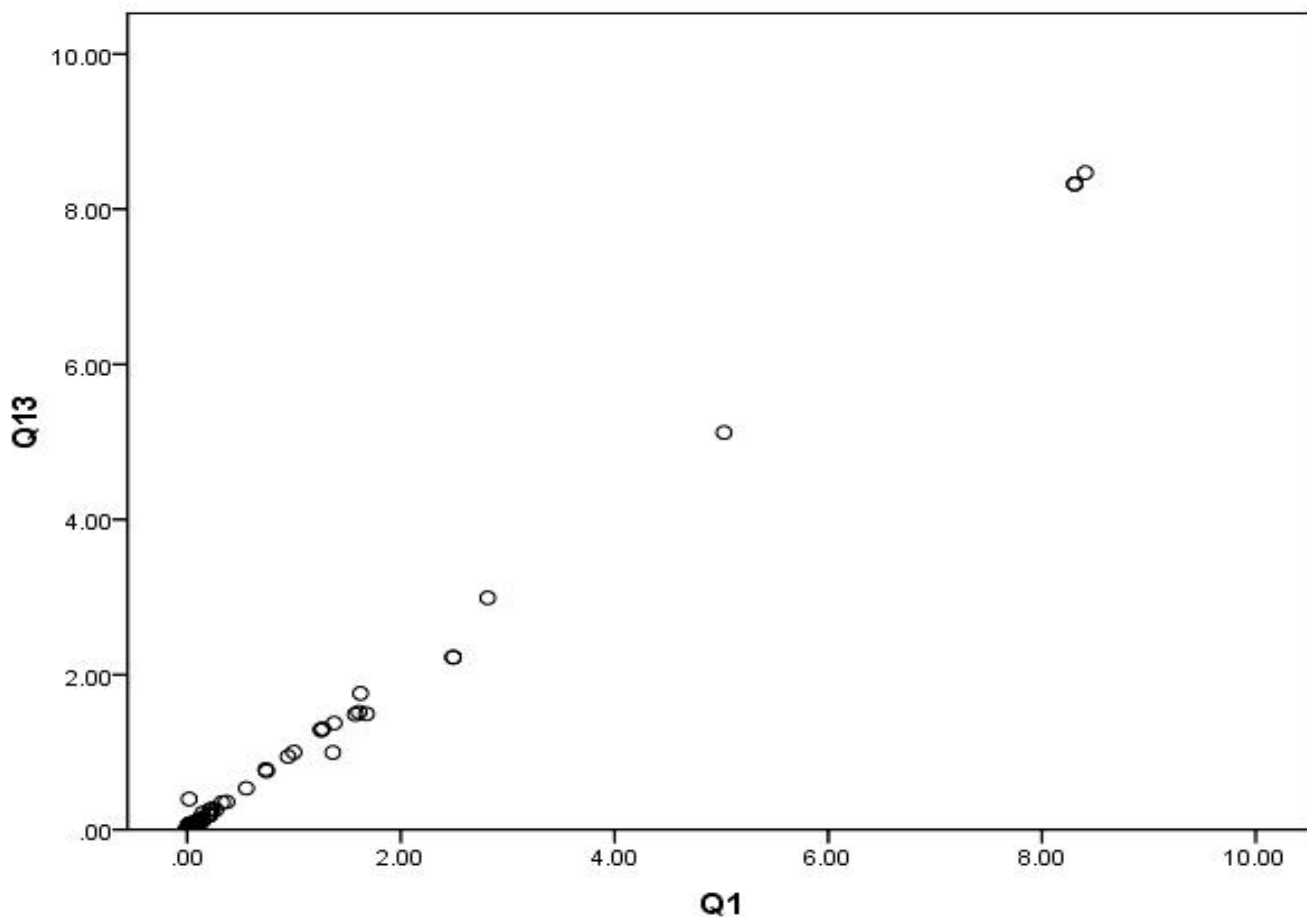

**Table S1.** Comparison of sixteen detectable metabolites between 0-I and II-IV aGVHD groups of patients.

| <b>Metabolites</b> | <b>Retention time (min)</b> | <b>m/z</b> | <b><i>P</i><sup>A</sup></b> | <b>FDR</b> | <b>AUC</b> |
|--------------------|-----------------------------|------------|-----------------------------|------------|------------|
| Palmitic acid (PA) | 23.08                       | 313        | 0.02*                       | 0.16       | 0.75       |
| Stearic acid(SA)   | 26.36                       | 341        | 0.03*                       | 0.17       | 0.72       |
| Galactose          | 20.98                       | 319        | 0.08                        | 0.26       | 0.70       |
| D-glucose          | 21.20                       | 319        | 0.08                        | 0.26       | 0.70       |
| L-phenylalanine    | 16.48                       | 218        | 0.11                        | 0.30       | 0.67       |
| Lactic acid        | 7.30                        | 117        | 0.15                        | 0.34       | 0.67       |
| Pyruvic acid       | 7.00                        | 174        | 0.18                        | 0.35       | 0.61       |
| L-Leucine          | 9.22                        | 86         | 0.23                        | 0.35       | 0.72       |
| Glycerol           | 11.46                       | 205        | 0.25                        | 0.35       | 0.65       |
| Oleic acid         | 25.94                       | 339        | 0.25                        | 0.35       | 0.63       |
| L-Valine           | 7.80                        | 72         | 0.25                        | 0.35       | 0.69       |
| Cholesterol        | 37.24                       | 329        | 0.55                        | 0.71       | 0.62       |
| Linoleic acid      | 25.85                       | 337        | 0.64                        | 0.72       | 0.60       |
| Mannose            | 23.42                       | 204        | 0.68                        | 0.72       | 0.50       |
| Urea               | 10.84                       | 189        | 0.68                        | 0.72       | 0.57       |
| L-Proline          | 14.95                       | 156        | 0.80                        | 0.80       | 0.46       |
| SA: PA             |                             |            | 0.0009*                     | 0.02       | 0.84       |

<sup>A</sup>PA, SA, and SA:PA ratio were significantly different between the two groups. \**P* < 0.05.



**Table S2.** Effect of potential risk factors, including the SA:PA ratio, on day 7 post-transplantation on aGVHD risk.

| Variable                             | Univariate <sup>A</sup> |          | Multivariate <sup>B</sup> |          | Multivariate <sup>B</sup> PA |          | Multivariate <sup>B</sup> SA |          | Multivariate <sup>C</sup> SA:PA |          |
|--------------------------------------|-------------------------|----------|---------------------------|----------|------------------------------|----------|------------------------------|----------|---------------------------------|----------|
|                                      | Odds Ratio<br>(95%CI)   | <i>P</i> | Odds Ratio<br>(95%CI)     | <i>P</i> | Odds Ratio<br>(95%CI)        | <i>P</i> | Odds Ratio<br>(95%CI)        | <i>P</i> | Odds Ratio<br>(95%CI)           | <i>P</i> |
| Sex<br>(Female vs. Male)             | 1.01<br>(0.46,2.19)     | 0.98     | NA                        | NA       | NA                           | NA       | NA                           | NA       | NA                              | NA       |
| Age<br>(Continuous)                  | 1.02<br>(0.98,1.05)     | 0.36     | NA                        | NA       | NA                           | NA       | NA                           | NA       | NA                              | NA       |
| Disease<br>(ALL vs. AML)             | 1.43<br>(0.67,3.07)     | 0.46     | NA                        | NA       | NA                           | NA       | NA                           | NA       | NA                              | NA       |
| Disease<br>(NHL vs. ALL)             | 0.62<br>(0.15,2.46)     | 0.66     | NA                        | NA       | NA                           | NA       | NA                           | NA       | NA                              | NA       |
| Status<br>(Other vs. CR1)            | 0.54<br>(0.19,1.5)      | 0.23     | NA                        | NA       | NA                           | NA       | NA                           | NA       | NA                              | NA       |
| Risk<br>(High vs. Low& Intermediate) | 0.97<br>(0.44,2.11)     | 0.93     | NA                        | NA       | NA                           | NA       | NA                           | NA       | NA                              | NA       |
| Source<br>(BM and PSC vs. BM or PSC) | 3.75<br>(1.6, 8.81)     | 0.002*   | 3.44<br>(1.45, 8.18)      | 0.005*   | 3.46<br>(1.42, 8.4)          | 0.006*   | 3.56<br>(1.37,9.27)          | 0.009*   | 5.13<br>(1.78,14.76)            | 0.002*   |
| HLA<br>(Mismatch vs. Match)          | 1.82<br>(0.82,4.03)     | 0.13     | NA                        | NA       | NA                           | NA       | NA                           | NA       | NA                              | NA       |

|                                                     |                     |             |                     |      |                      |      |                     |             |                     |             |
|-----------------------------------------------------|---------------------|-------------|---------------------|------|----------------------|------|---------------------|-------------|---------------------|-------------|
| ABO blood type<br>(Mismatch vs.<br>Match)           | 1.48<br>(0.69,3.19) | 0.31        | NA                  | NA   | NA                   | NA   | NA                  | NA          | NA                  | NA          |
| Donor / recipient<br>sex<br>(Mismatch vs.<br>Match) | 2.11<br>(0.96,4.66) | 0.06        | 1.82<br>(0.80,4.14) | 0.15 | 1.75<br>(0.76,4.06)  | 0.19 | 2.08<br>(0.85,5.14) | 0.11        | 2.14<br>(0.79,5.77) | 0.133       |
| Donor sex<br>(Female vs. Male)                      | 0.95<br>(0.44,2.06) | 0.9         | NA                  | NA   | NA                   | NA   | NA                  | NA          | NA                  | NA          |
| Female to male<br>(Yes vs. No)                      | 1.34<br>(0.58,3.13) | 0.49        | NA                  | NA   | NA                   | NA   | NA                  | NA          | NA                  | NA          |
| MNC<br>(Continuous)                                 | 1.03<br>(0.94,1.13) | 0.48        | NA                  | NA   | NA                   | NA   | NA                  | NA          | NA                  | NA          |
| CD34(+) cells<br>(Continuous)                       | 1.11<br>(0.89,1.38) | 0.36        | NA                  | NA   | NA                   | NA   | NA                  | NA          | NA                  | NA          |
| Conditioning<br>(TBI / Cy <sup>i</sup> vs.<br>BUCy) | 0.71<br>(0.31,1.61) | 0.41        | NA                  | NA   | NA                   | NA   | NA                  | NA          | NA                  | NA          |
| PA<br>(Continuous)                                  | 4.42<br>(1.1,17.71) | 0.03*       | NA                  | NA   | 4.24<br>(0.98,18.35) | 0.05 | NA                  | NA          | NA                  | NA          |
| SA<br>(Continuous)                                  | 0.08<br>(0.02,0.29) | <<br>0.001* | NA                  | NA   | NA                   | NA   | 0.07<br>(0.02,0.28) | <<br>0.001* | NA                  | NA          |
| SA:PA<br>(High vs. Low,<br>Cutoff = 0.731)          | 0.09<br>(0.03,0.22) | <<br>0.001* | NA                  | NA   | NA                   | NA   | NS                  | NS          | 0.06<br>(0.02,0.18) | <<br>0.001* |



<sup>A</sup>In univariate analyses, aGVHD was associated with stem cell source, PA, SA, and SA:PA ratio. <sup>B</sup>Multivariate analysis showed that both SA and the SA:PA ratio decreased whereas PA increased the likelihood of II-IV aGVHD. <sup>C</sup>Compared with patients with a low SA:PA ratio, patients with a high SA:PA ratio were less likely to develop II-IV aGVHD ( $P < 0.001$ ). **Abbreviations used:** ALL = Acute lymphoblastic leukemia; AML = Acute myelogenous leukemia; NHL = Non-hodgkin's lymphoma; CR1 = complete remission at first course; BM = Bone marrow; PSC = Peripheral stem cells; MNC = mononuclear cells; Values shown indicate number of cells in millions, BU = Busulfan, Cy = cyclophosphamide, TBI = total body irradiation; NA denotes "not applicable". 95% CI = 95% confidence interval; \* $P < 0.05$ .

**Table S3.** Effect of potential risk factors, including the SA:PA ratio, on day 7 post-transplantation on overall survival.

| Variable              | Univariate <sup>A</sup> |          | Multivariate         |          | Multivariate SA      |          | Multivariate <sup>B</sup><br>SA:PA |          |
|-----------------------|-------------------------|----------|----------------------|----------|----------------------|----------|------------------------------------|----------|
|                       | Odds Ratio (95%CI)      | <i>P</i> | Odds Ratio (95%CI)   | <i>P</i> | Odds Ratio (95%CI)   | <i>P</i> | Odds Ratio (95%CI)                 | <i>P</i> |
| Sex (Female vs. Male) | 0.80<br>(0.45, 1.41)    | 0.44     | NA                   | NA       | NA                   | NA       | NA                                 | NA       |
| Age (Continuous)      | 0.99<br>(0.97, 1.01)    | 0.43     | NA                   | NA       | NA                   | NA       | NA                                 | NA       |
| Disease (ALL vs. AML) | 0.98<br>(0.54, 1.79)    | 0.96     | 1.36<br>(0.69, 2.67) | 0.37     | 1.43<br>(0.74, 2.78) | 0.29     | 1.45<br>(0.75, 2.82)               | 0.27     |

|                                               |                      |        |                      |       |                      |       |                      |      |
|-----------------------------------------------|----------------------|--------|----------------------|-------|----------------------|-------|----------------------|------|
| Disease<br>(NHL <sup>c</sup> vs. ALL)         | 2.61<br>(1.15, 5.96) | 0.02*  | 1.79<br>(0.67, 4.75) | 0.25  | 1.64<br>(0.62, 4.35) | 0.32  | 1.57<br>(0.58, 4.23) | 0.37 |
| Status<br>(Other vs. CR1)                     | 2.69<br>(1.47, 4.95) | 0.001* | 1.70<br>(0.74, 3.92) | 0.21  | 1.69<br>(0.75, 3.79) | 0.21  | 1.62<br>(0.71, 3.69) | 0.25 |
| Risk<br>(High vs. Low & Intermediate)         | 1.57<br>(0.91, 2.73) | 0.11   | 0.98<br>(0.49, 1.97) | 0.96  | 0.96<br>(0.48, 1.89) | 0.89  | 1.01<br>(0.51, 1.99) | 0.99 |
| Source<br>(BM and PSC vs. BM or PSC)          | 1.21<br>(0.67, 2.20) | 0.52   | NA                   | NA    | NA                   | NA    | NA                   | NA   |
| HLA<br>(Mismatch vs. Match)                   | 1.98<br>(1.14, 3.44) | 0.015* | 2.06<br>(1.15, 3.66) | 0.01* | 2.10<br>(1.18, 3.73) | 0.01* | 1.97<br>(1.10, 3.51) | 0.02 |
| ABO blood type<br>(Mismatch vs. Match)        | 1.26<br>(0.73, 2.22) | 0.40   | NA                   | NA    | NA                   | NA    | NA                   | NA   |
| Donor / recipient sex<br>(Mismatch vs. Match) | 1.07<br>(0.61, 1.86) | 0.82   | NA                   | NA    | NA                   | NA    | NA                   | NA   |
| Donor sex<br>(Female vs. Male)                | 0.76<br>(0.43, 1.36) | 0.36   | NA                   | NA    | NA                   | NA    | NA                   | NA   |
| Female to male<br>(Yes vs. No)                | 1.10<br>(0.60, 2.04) | 0.75   | NA                   | NA    | NA                   | NA    | NA                   | NA   |
| MNC<br>(Continuous)                           | 1.02<br>(0.95, 1.10) | 0.60   | NA                   | NA    | NA                   | NA    | NA                   | NA   |
| CD34(+) cells<br>(Continuous)                 | 0.97<br>(0.82, 1.15) | 0.74   | NA                   | NA    | NA                   | NA    | NA                   | NA   |

|                                        |                         |        |                         |      |                         |      |                         |      |
|----------------------------------------|-------------------------|--------|-------------------------|------|-------------------------|------|-------------------------|------|
| Conditioning<br>(TBI / Cy vs.<br>BUCy) | 2.31<br>(1.33,4.05<br>) | 0.003* | 1.71<br>(0.80,<br>3.64) | 0.16 | 1.72<br>(0.81,<br>3.63) | 0.16 | 1.90<br>(0.89,<br>4.05) | 0.09 |
| PA<br>(Continuous)                     | 0.71<br>(0.26,1.93<br>) | 0.50   | NA                      | NA   | NA                      | NA   | NA                      | NA   |
| SA<br>(Continuous)                     | 2.08<br>(0.94,<br>4.61) | 0.07   | NA                      | NA   | 1.97<br>(0.85,<br>4.55) | 0.11 | NA                      | NA   |
| SA:PA<br>(Continuous)                  | 1.95<br>(0.97,<br>3.91) | 0.06   | NA                      | NA   | NA                      | NA   | 1.95<br>(0.92,<br>4.14) | 0.08 |

<sup>A</sup>In univariate analyses, disease type, disease status, risk stratification, HLA match, and conditioning were associated with overall survival. <sup>B</sup>Multivariate analysis showed that the SA:PA ratio had no significant impact on overall survival ( $P = 0.08$ ). **Abbreviations used** ALL = Acute lymphoblastic leukemia; AML = Acute myelogenous leukemia; NHL = Non-hodgkin`s lymphoma; CR1 = complete remission at first course; BM = Bone marrow; PSC = Peripheral stem cells; MNC = mononuclear cells; values shown indicate number of cells in millions; BU = busulfan; Cy = cyclophosphamide; TBI = total body irradiation; NA denotes “not applicable”. 95% CI = 95% confidence interval. \* $P < 0.05$ .

**Table S4.** Effect of potential risk factors, including the SA:PA ratio, on day 7 post-transplantation on the risk of relapse after transplantation.

| Variable                           | Univariate <sup>A</sup> |          | Multivariate        |          | Multivariate SA     |          | Multivariate <sup>B</sup> SA:PA |          |
|------------------------------------|-------------------------|----------|---------------------|----------|---------------------|----------|---------------------------------|----------|
|                                    | Odds Ratio (95% CI)     | <i>P</i> | Odds Ratio (95% CI) | <i>P</i> | Odds Ratio (95% CI) | <i>P</i> | Odds Ratio (95% CI)             | <i>P</i> |
| Sex (Female vs. Male)              | 0.87 (0.43, 1.78)       | 0.71     | NA                  | NA       | NA                  | NA       | NA                              | NA       |
| Age (Continuous)                   | 1 (0.97, 1.03)          | 0.95     | NA                  | NA       | NA                  | NA       | NA                              | NA       |
| Disease (ALL vs. AML)              | 0.84 (0.38, 1.85)       | 0.66     | 1.13 (0.44, 2.89)   | 0.80     | 1.16 (0.47, 2.84)   | 0.75     | 1.23 (0.51, 2.95)               | 0.65     |
| Disease (NHL vs. ALL)              | 3.64 (1.42, 9.32)       | 0.007*   | 1.68 (0.50, 5.65)   | 0.40     | 1.82 (0.57, 5.75)   | 0.31     | 1.51 (0.45, 4.99)               | 0.50     |
| Status (Other vs. CR1)             | 3.68 (1.75, 7.77)       | 0.0006*  | 2.39 (0.49, 11.60)  | 0.28     | 2.34 (0.53, 10.27)  | 0.26     | 2.41 (0.58, 10.04)              | 0.23     |
| Risk (High vs. Low & Intermediate) | 2.54 (1.26, 5.15)       | 0.0095*  | 1.66 (0.66, 4.20)   | 0.29     | 1.54 (0.64, 3.74)   | 0.34     | 1.63 (0.70, 3.82)               | 0.26     |
| Source (BM and PSC vs. BM or PSC)  | 0.89 (0.40, 1.99)       | 0.77     | NA                  | NA       | NA                  | NA       | NA                              | NA       |
| HLA (Mismatch vs. Match)           | 0.94 (0.44, 2.00)       | 0.87     | NA                  | NA       | NA                  | NA       | NA                              | NA       |

|                                             |                      |        |                      |      |                      |      |                      |       |
|---------------------------------------------|----------------------|--------|----------------------|------|----------------------|------|----------------------|-------|
| ABO blood type<br>(Mismatch vs. Match)      | 1.5<br>(0.75, 3.01)  | 0.25   | NA                   | NA   | NA                   | NA   | NA                   | NA    |
| Donor/recipient sex<br>(Mismatch vs. Match) | 1.28<br>(0.62, 2.65) | 0.50   | NA                   | NA   | NA                   | NA   | NA                   | NA    |
| Donor sex<br>(Female vs. Male)              | 0.65<br>(0.31, 1.37) | 0.26   | NA                   | NA   | NA                   | NA   | NA                   | NA    |
| Female to male<br>(Yes vs. No)              | 1.15<br>(0.53, 2.48) | 0.73   | NA                   | NA   | NA                   | NA   | NA                   | NA    |
| MNC<br>(Continuous)                         | 0.96<br>(0.88, 1.04) | 0.28   | NA                   | NA   | NA                   | NA   | NA                   | NA    |
| CD34(+) cells<br>(Continuous)               | 1.06<br>(0.87, 1.3)  | 0.57   | NA                   | NA   | NA                   | NA   | NA                   | NA    |
| Conditioning<br>(TBI/ Cy vs. BUCy)          | 2.42<br>(1.20, 4.9)  | 0.014* | 1.03<br>(0.27, 3.95) | 0.96 | 1<br>(0.26, 3.89)    | 1    | 1.26<br>(0.36, 4.39) | 0.72  |
| PA<br>(Continuous)                          | 0.82<br>(0.24, 2.75) | 0.75   | NA                   | NA   | NA                   | NA   | NA                   | NA    |
| SA<br>(Continuous)                          | 3.2<br>(1.21, 8.47)  | 0.019* | NA                   | NA   | 2.68<br>(0.95, 7.58) | 0.06 | NA                   | NA    |
| SA:PA<br>(High vs. Low cutoff = 1.3667)     | 2.11<br>(1.03, 4.32) | 0.04*  | NA                   | NA   | NA                   | NA   | 2.26<br>(1.04, 4.91) | 0.04* |

<sup>A</sup>In univariate analyses, disease type, disease status, risk stratification, and conditioning were associated with relapse. <sup>B</sup>After adjustment for these variables, patients in the group with high SA:PA ratios were significantly more likely to relapse than those in the group with low ratios ( $P = 0.04$ ). **Abbreviations used:** ALL = acute lymphoblastic leukemia; AML = acute myelogenous leukemia; NHL = non-hodgkin's lymphoma; CR1 = complete remission at first course; BM = bone marrow; PSC = peripheral stem cells; MNC = mononuclear cells; values shown indicate number of cells in millions, BU = busulfan; Cy = cyclophosphamide; TBI = total body irradiation; NA denotes "not applicable". 95% CI=95% confidence interval. \* $P < 0.05$ .

**Table S5.** Association of PA, SA, and SA:PA ratio with the occurrence of CMV or EBV infection or bacterial infection within 30 days post- transplantation<sup>A</sup>.

| Covariable | CMV reactivation |      |            | EBV reactivation |        |            | Bacterial infection |      |            |
|------------|------------------|------|------------|------------------|--------|------------|---------------------|------|------------|
|            | <i>P</i>         | HR   | 95% IC     | <i>P</i>         | HR     | 95% IC     | <i>P</i>            | HR   | 95% IC     |
| PA         | 0.93             | 0.86 | 0.03-22.24 | 0.21             | 0.004  | 0-25.41    | 0.48                | 2.64 | 0.18-39.86 |
| SA         | 0.40             | 0.28 | 0.01-5.45  | 0.18             | 124.96 | 0.10-15260 | 0.86                | 0.80 | 0.07-9.51  |
| SA/PA      | 0.56             | 2.53 | 0.11-57,54 | 0.25             | 0.01   | 0-21.22    | 0.51                | 2.49 | 0.17-36.91 |

<sup>A</sup>Abbreviations used: CMV = cytomegalovirus; EBV = Epstein-Barr virus; 95% CI = 95% confidence interval; HR = hazard ratio
